# Supplementary material
Source: PubMed Central journal article supplement (PMC2777528)

# Supporting Information

## Recombinant Squalene Synthase. Synthesis of Non-Head to Tail Triterpenes

Jian-Jung Pan,<sup>†</sup> Tim S. Bugni,<sup>‡</sup> Chris M. Ireland,<sup>‡</sup> and C. Dale Poulter<sup>‡\*</sup>

<sup>†</sup>Department of Chemistry, University of Utah, 315 South 1400 East RM 2020, Salt Lake City, Utah 84112

<sup>‡</sup>Department of Medicinal Chemistry, University of Utah, 30 South 2000 East RM 307, Salt Lake City, Utah, 84112

Email: [poulter@chemistry.utah.edu](mailto:poulter@chemistry.utah.edu)

| <b>Table of Contents:</b>                           | <b>Page No.</b> |
|-----------------------------------------------------|-----------------|
| Materials                                           | S2              |
| <sup>1</sup> H NMR spectra of HCB                   | S3 – S4         |
| <sup>1</sup> H- <sup>1</sup> H COSY spectra of HCB  | S5 – S8         |
| <sup>1</sup> H- <sup>13</sup> C HSQC spectra of HCB | S9 – S10        |
| <sup>1</sup> H- <sup>13</sup> C HMBC spectra of HCB | S11 – S12       |
| NOE spectra of HCB                                  | S13 – S14       |

**Materials.** Designed PCR primers were ordered from Integrated DNA Technologies. All restriction enzymes and T4 DNA ligase were purchased from New England Biolabs. pGEM-T Easy vector was purchased from Promega. Easy-A PCR cloning enzyme and XL1-Blue competent cells were purchased from Stratagene. pET28b+ vector and BL21(DE3) were purchased from Novagen. EDTA-free protease inhibitor cocktail tablets were purchased from Roche Diagnostics. Ni-nitrilotriacetic acid (Ni-NTA) agarose resin was purchased from Qiagen. *N*-[2-Hydroxyethyl]-piperazine-*N'*-[2-ethanesulfonic acid] (HEPES) was from USB Corporation.  $\beta$ -Mercaptoethanol (BME) and 3-(*N*-Morpholino)-propanesulfonic acid (MOPS) were from Sigma. HPLC grade hexanes and methyl *tert*-butyl ether (MTBE) were from EMD Chemicals and Mallinckrodt Chemicals, respectively.

<sup>1</sup>H-NMR

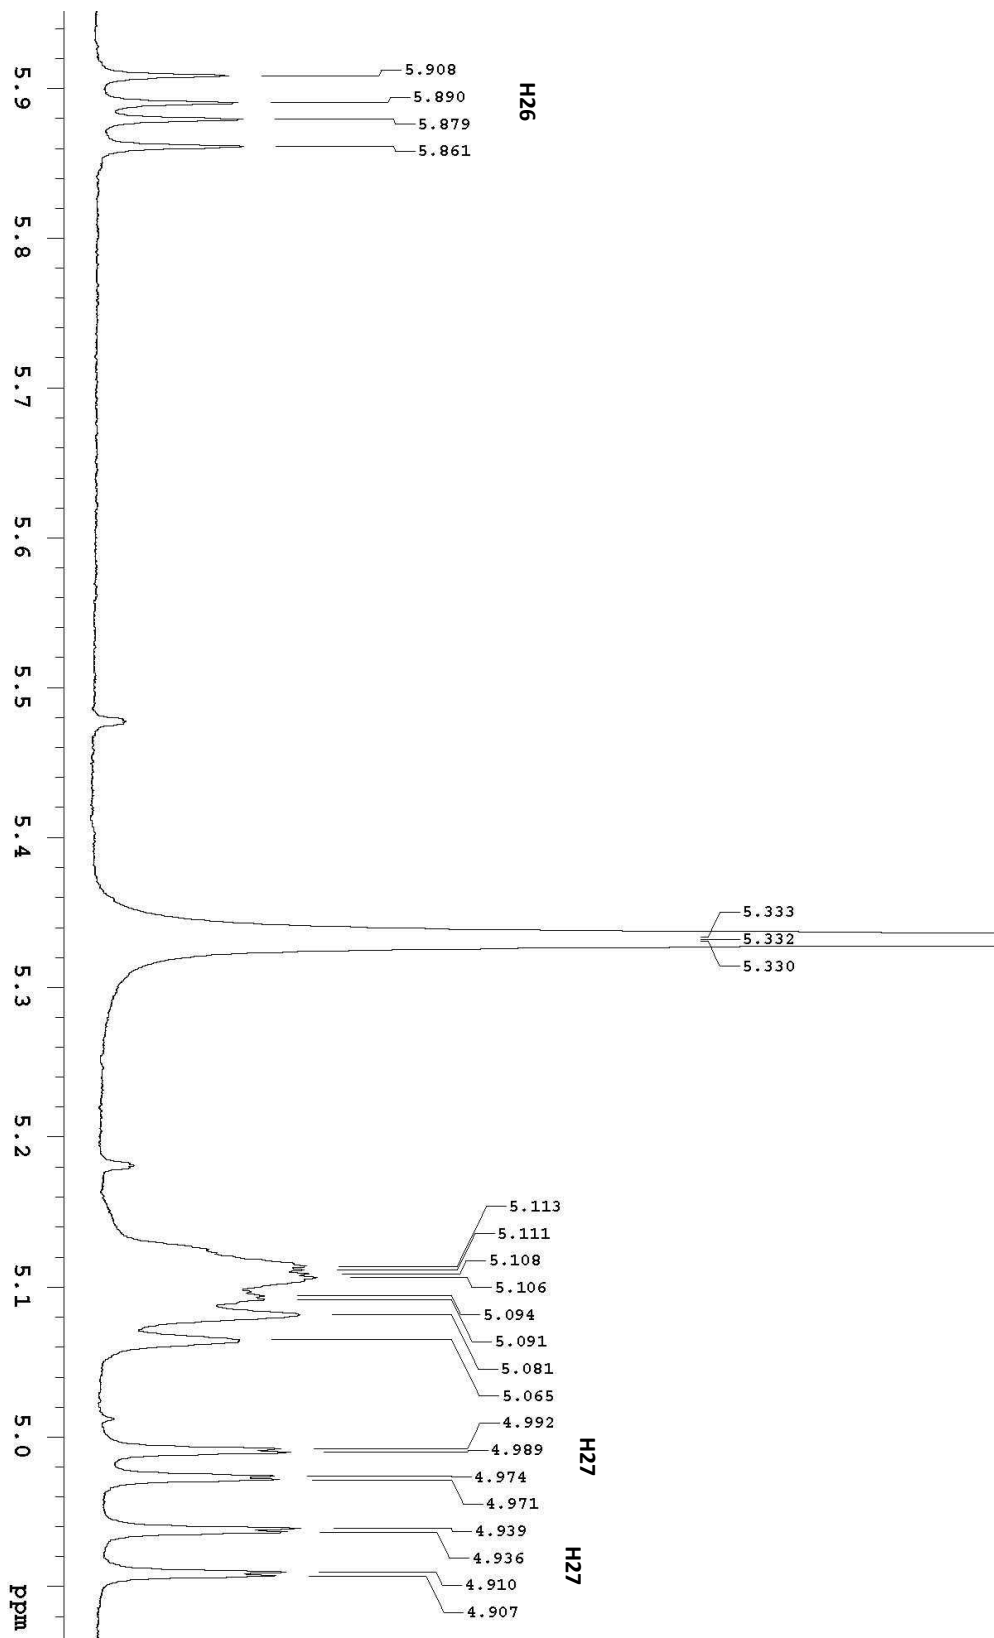

<sup>1</sup>H-NMR

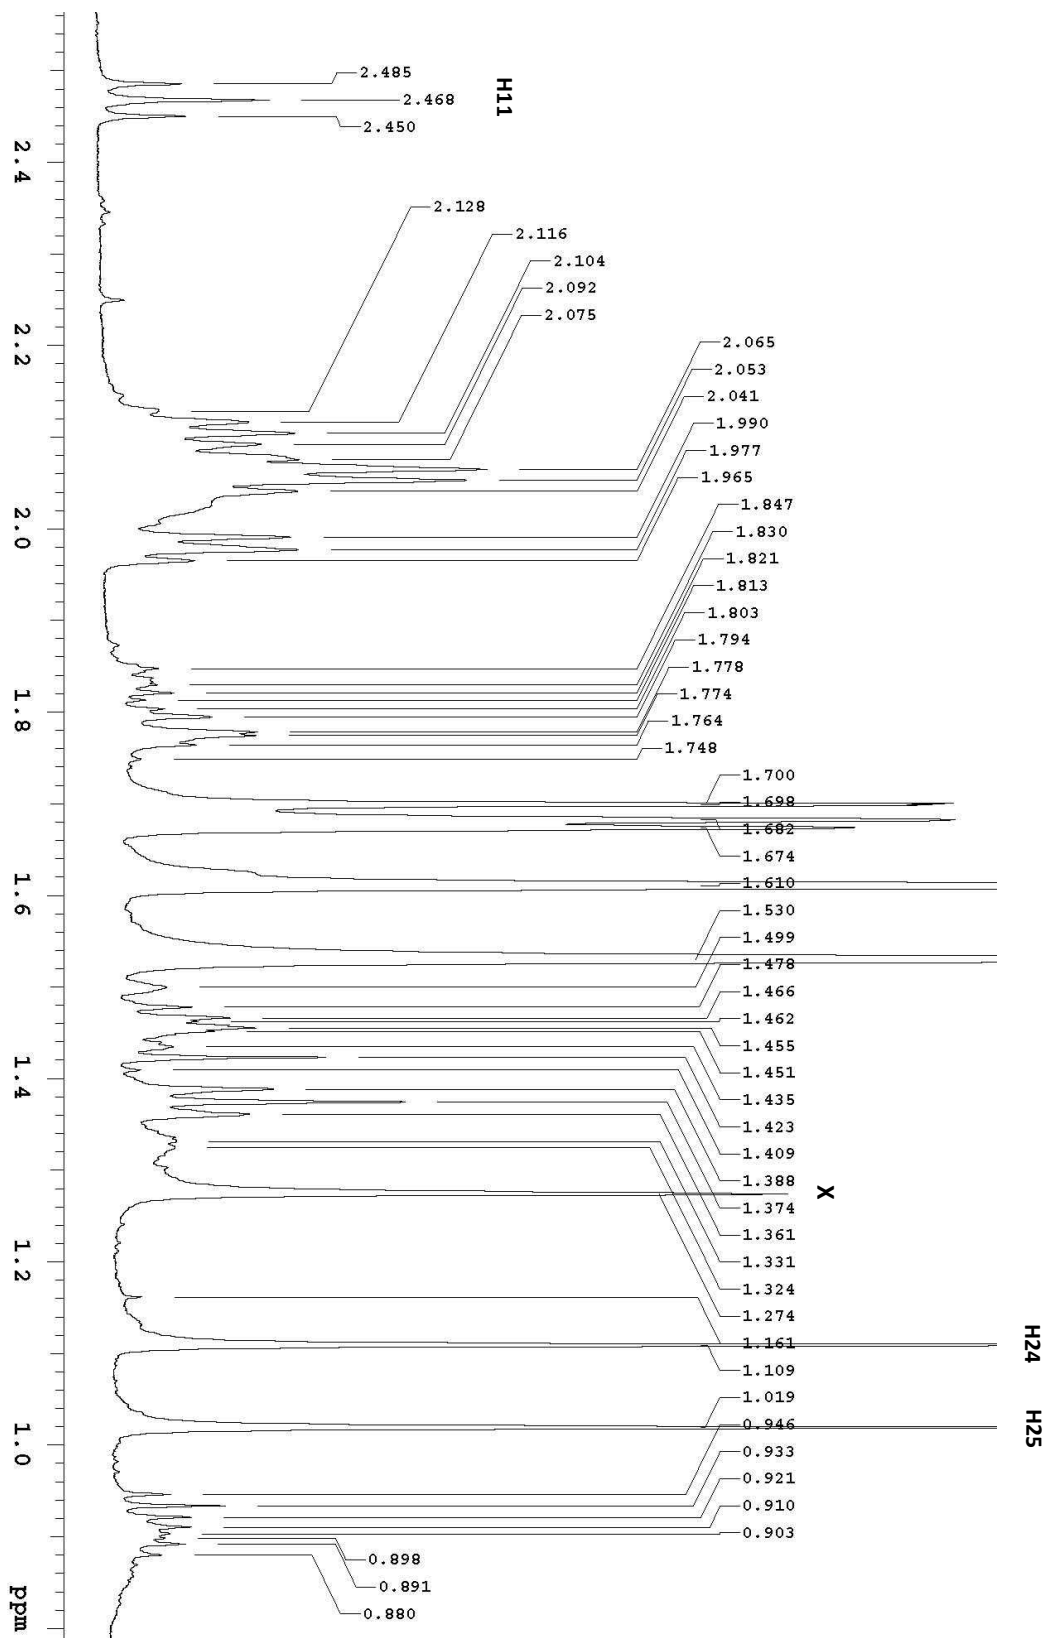

$^1\text{H}$ - $^1\text{H}$  DQCOSY

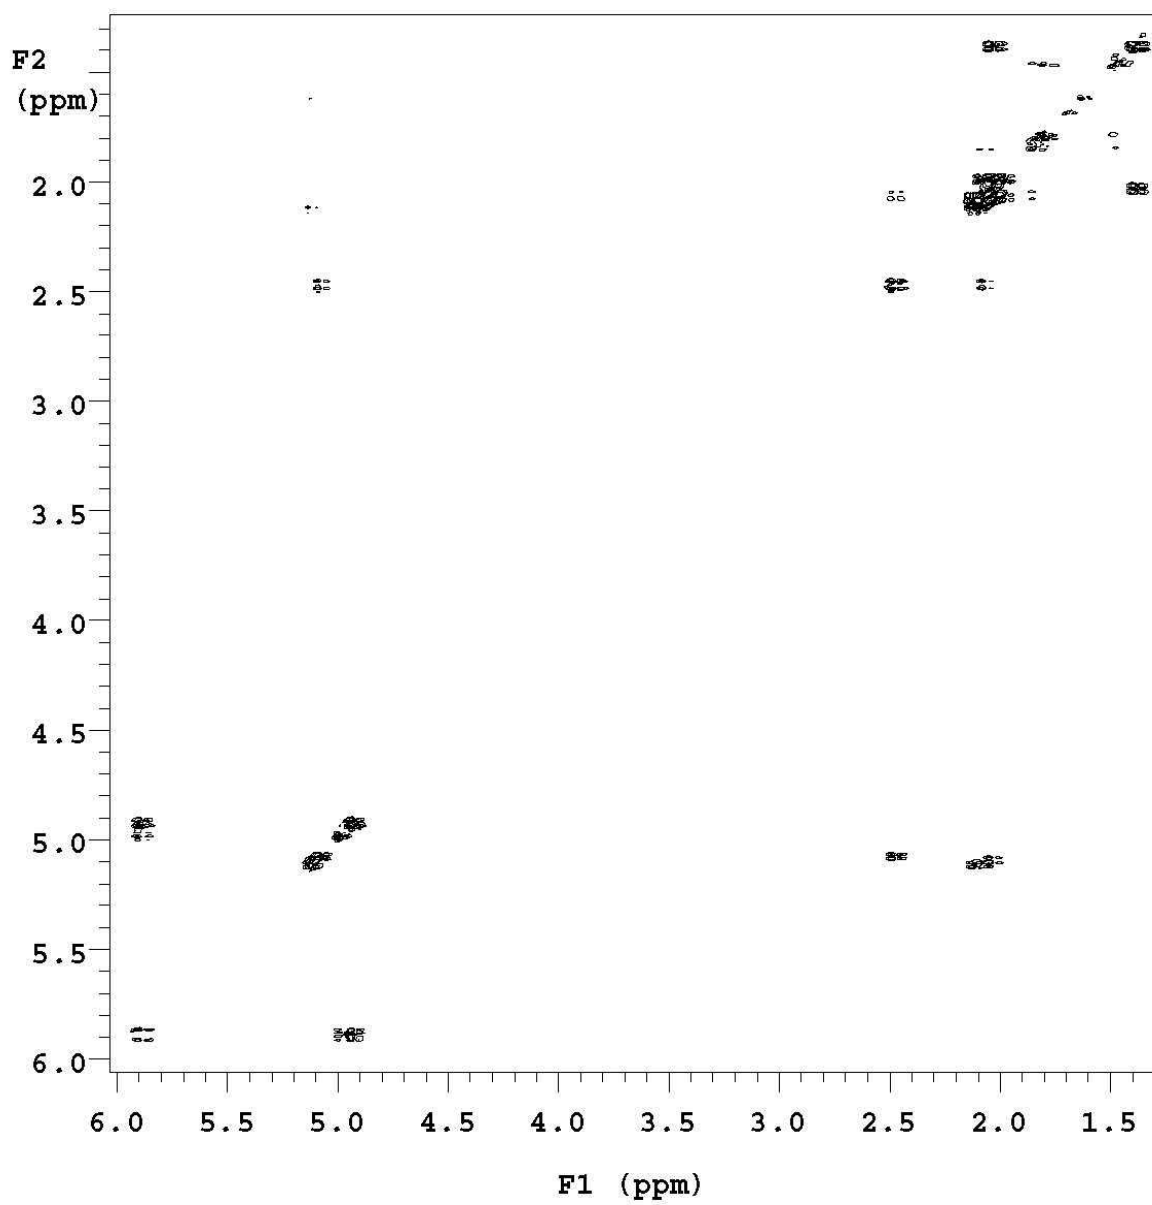

$^1\text{H}$ - $^1\text{H}$  DQCOSY

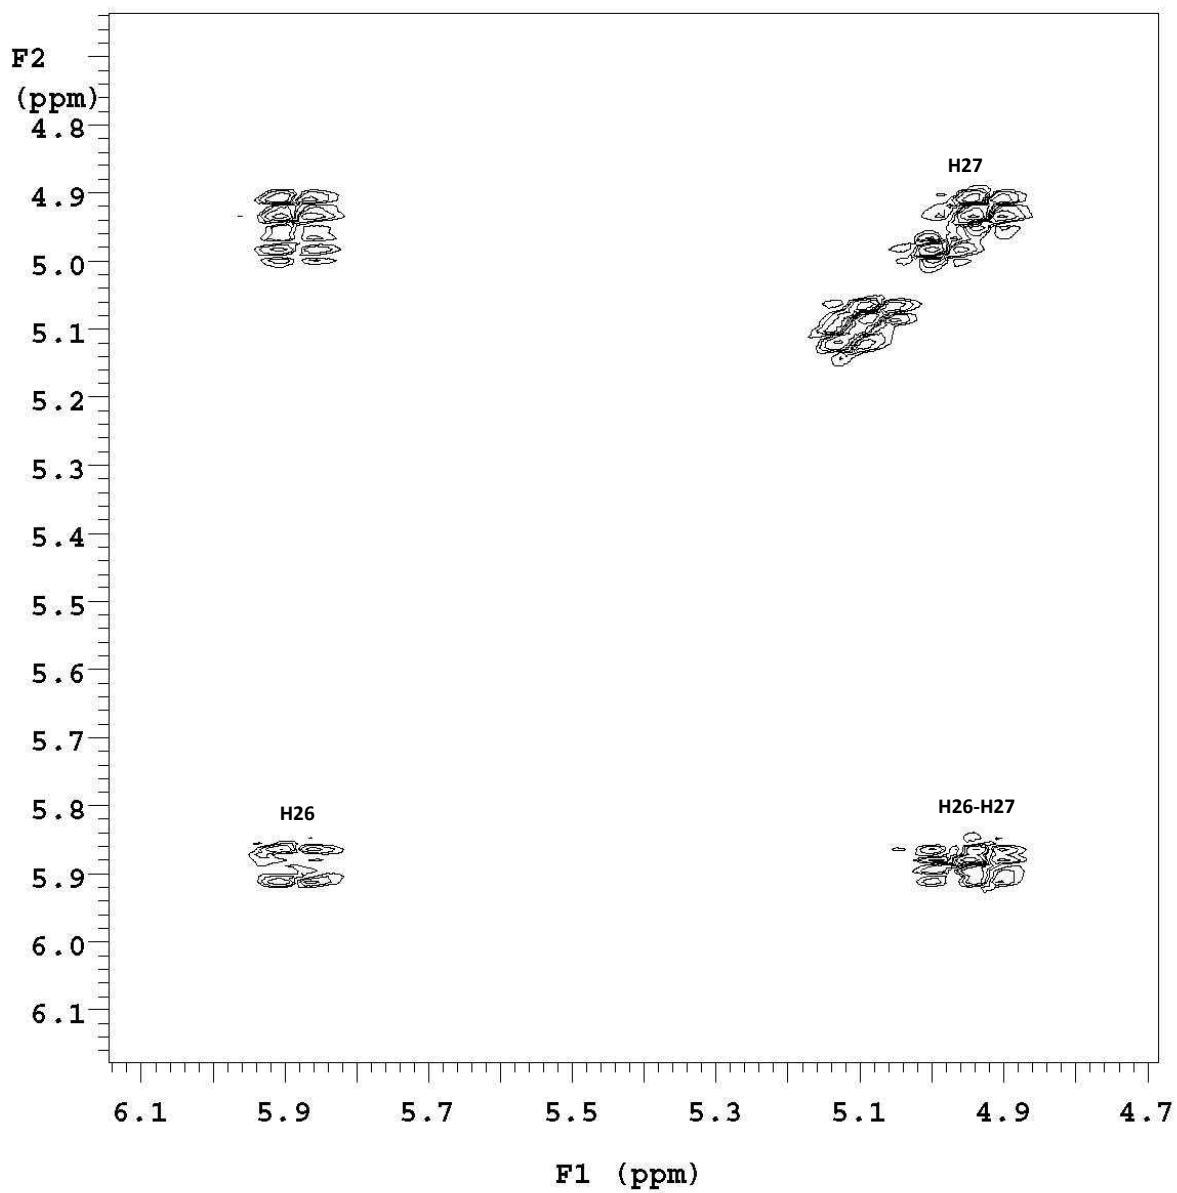

$^1\text{H}$ - $^1\text{H}$  DQCOSY

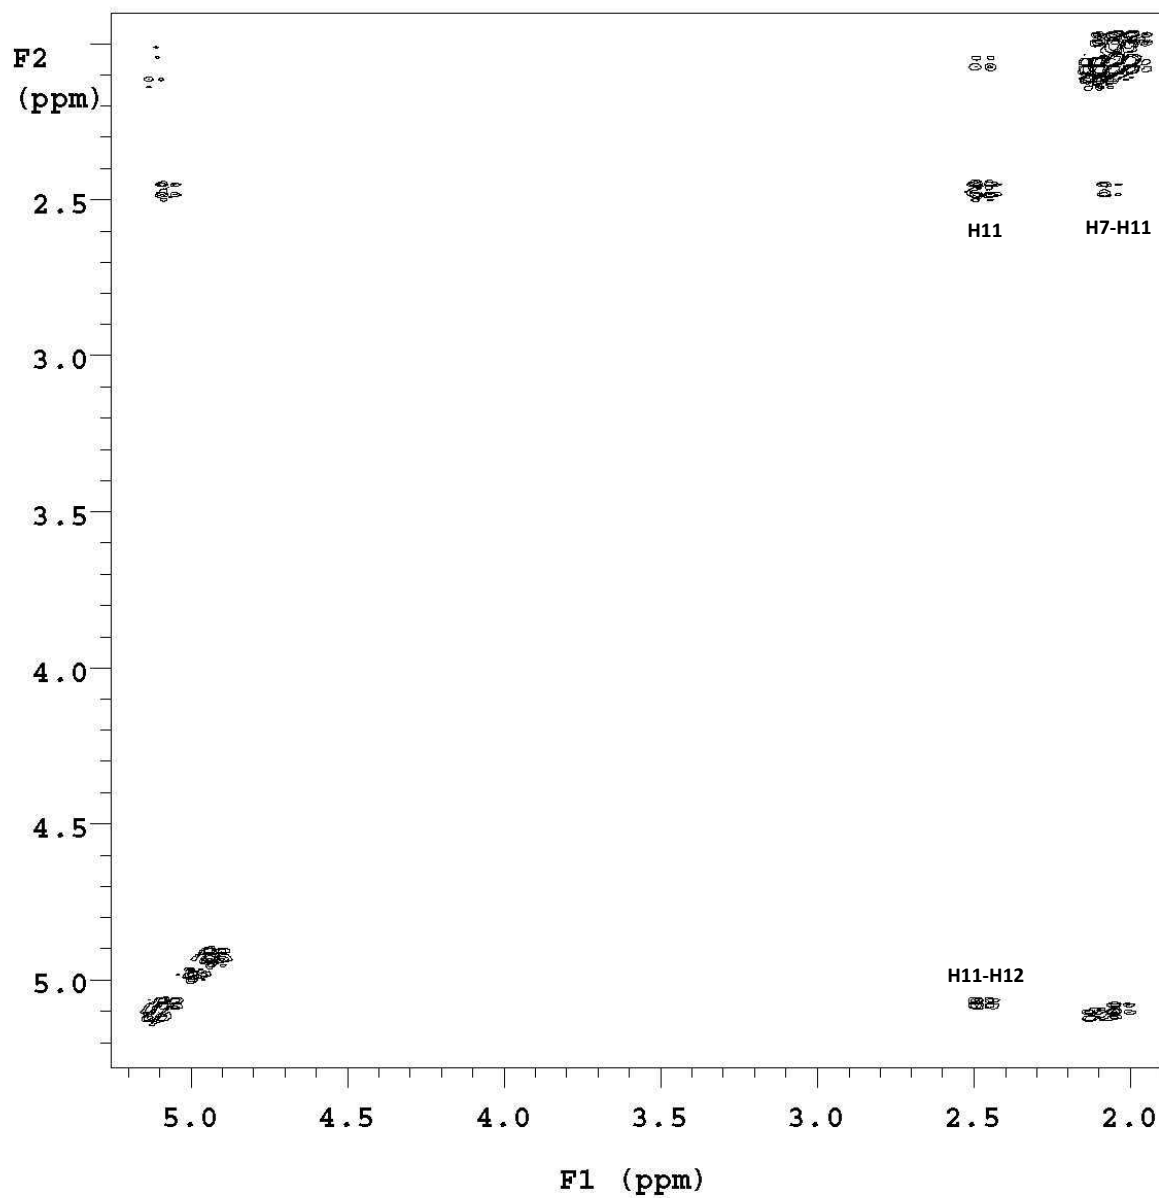

$^1\text{H}$ - $^1\text{H}$  DQCOSY

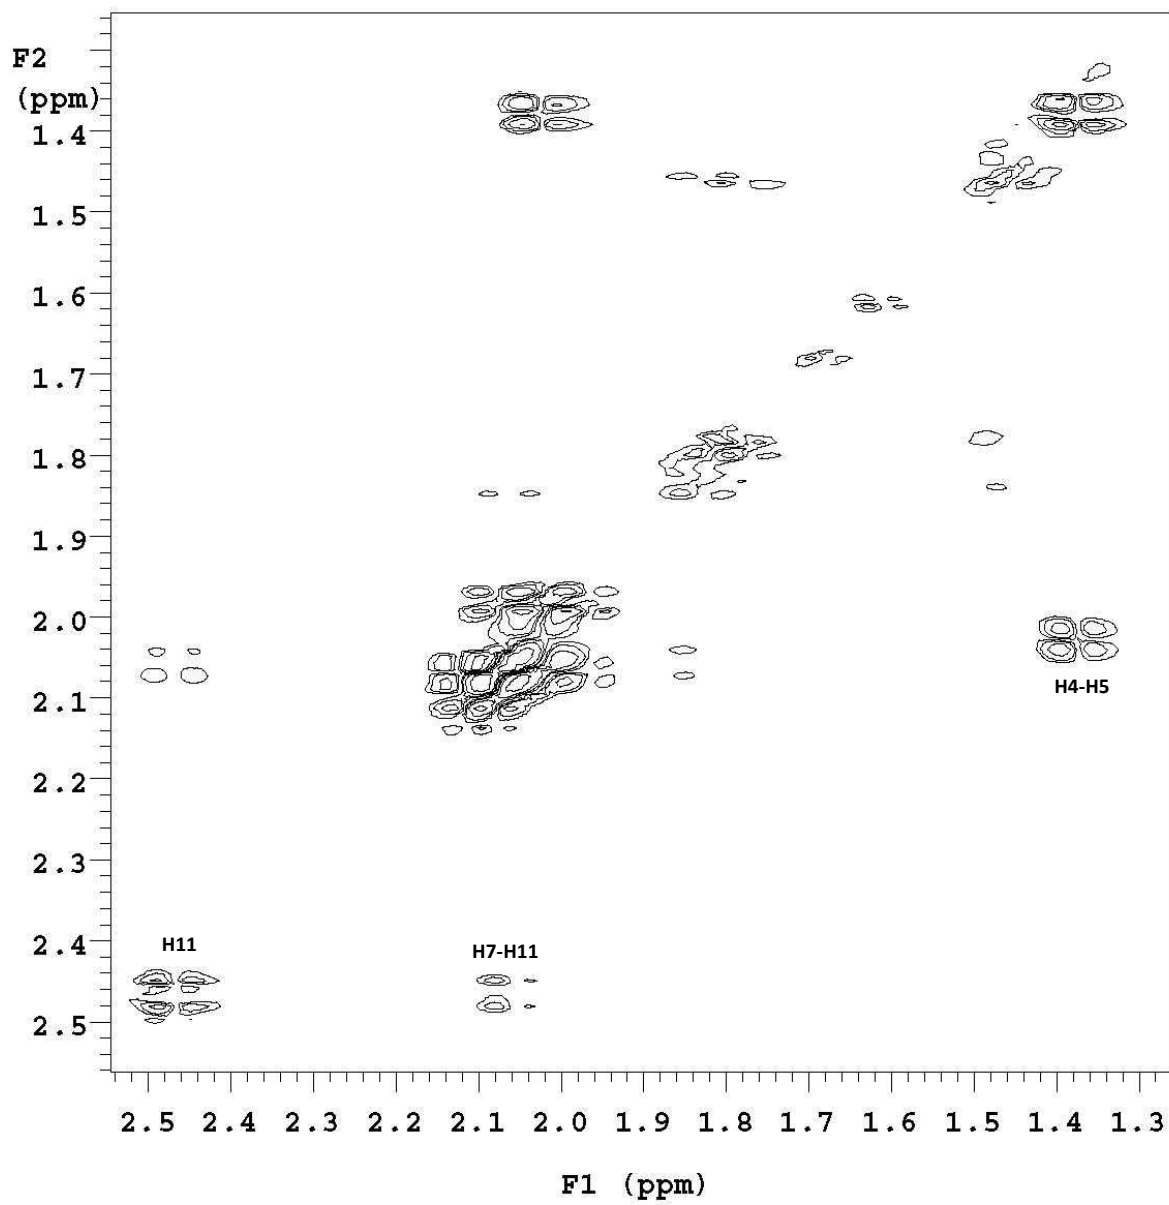



$^1\text{H}$ - $^{13}\text{C}$  HSQC

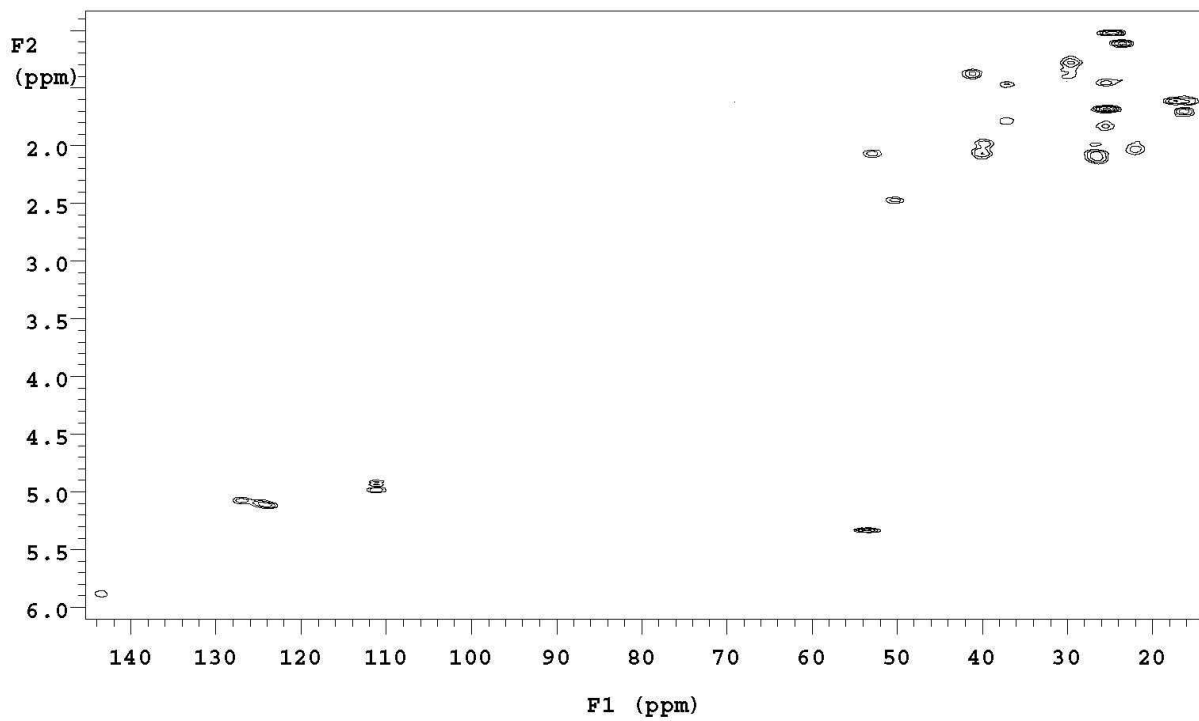

$^1\text{H}-^{13}\text{C}$  HSQC

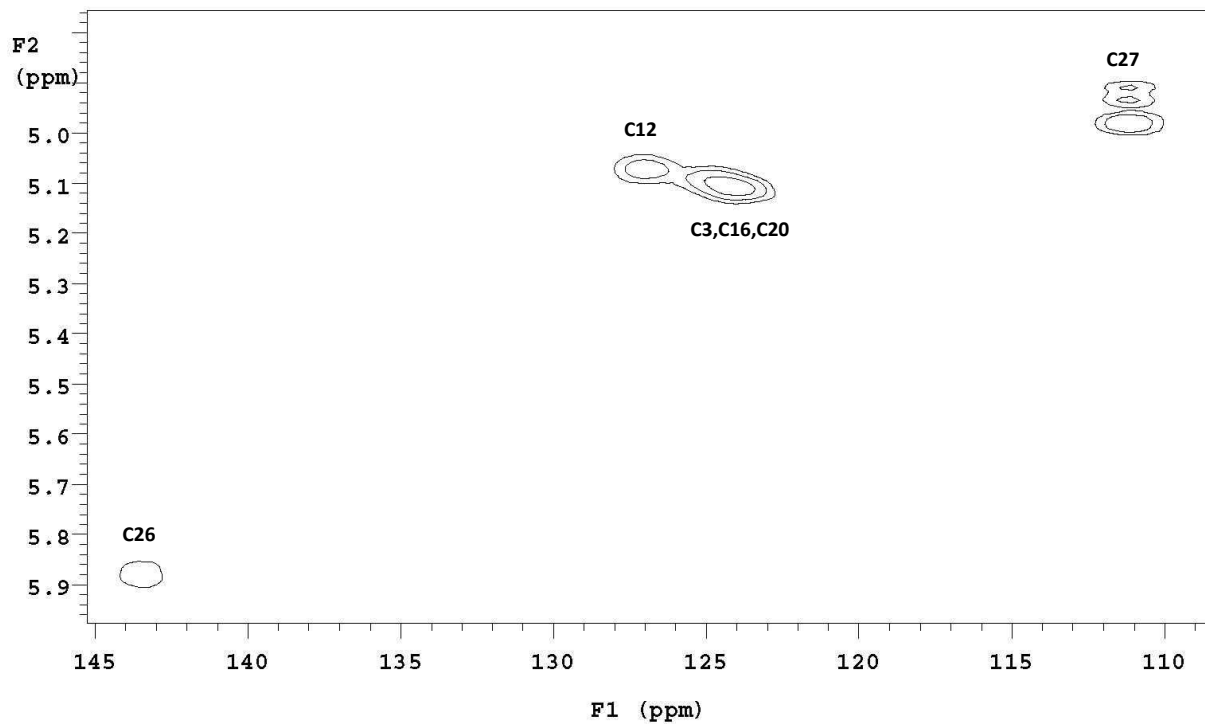

$^1\text{H}-^{13}\text{C}$  HSQC

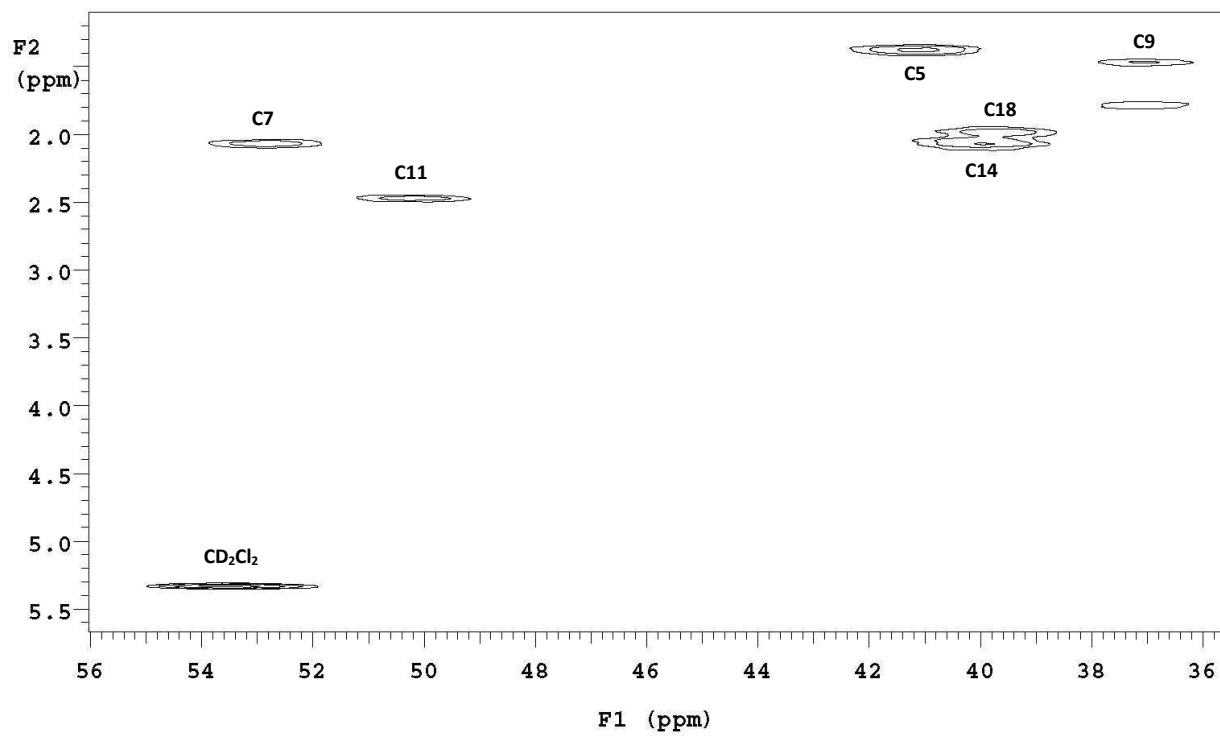

$^1\text{H}-^{13}\text{C}$  HSQC

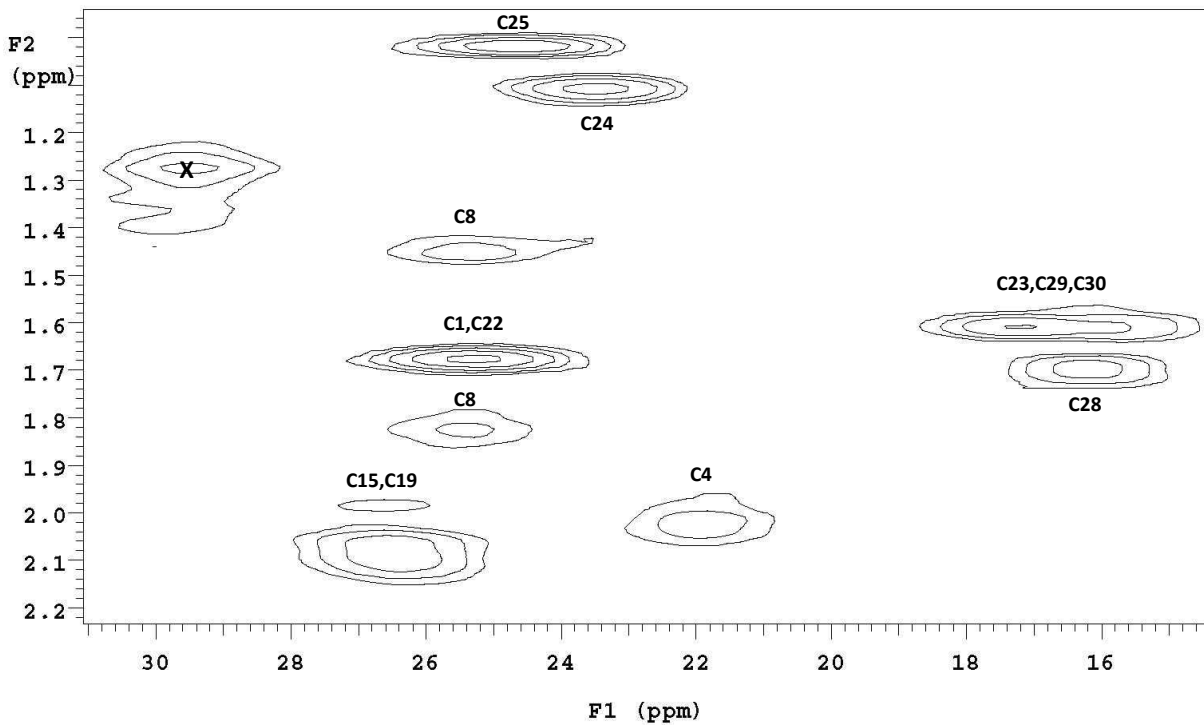

$^1\text{H}-^{13}\text{C}$  HMBC

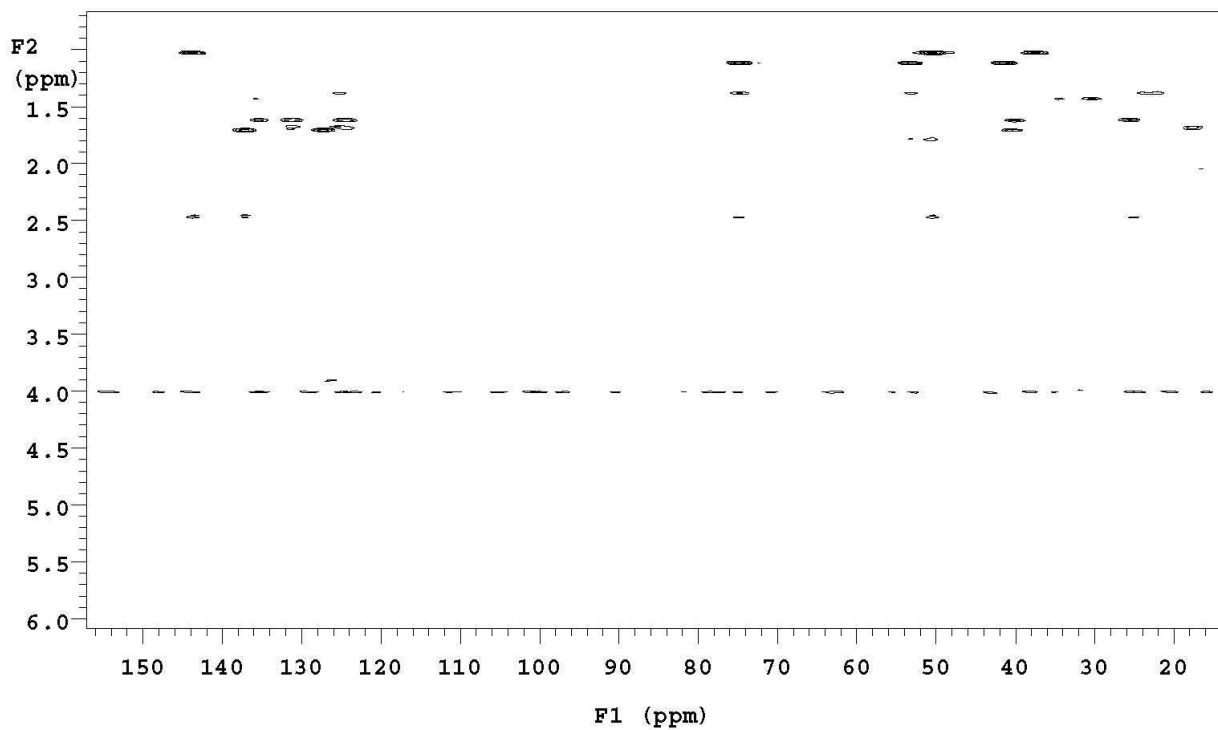



$^1\text{H}-^{13}\text{C}$  HMBC

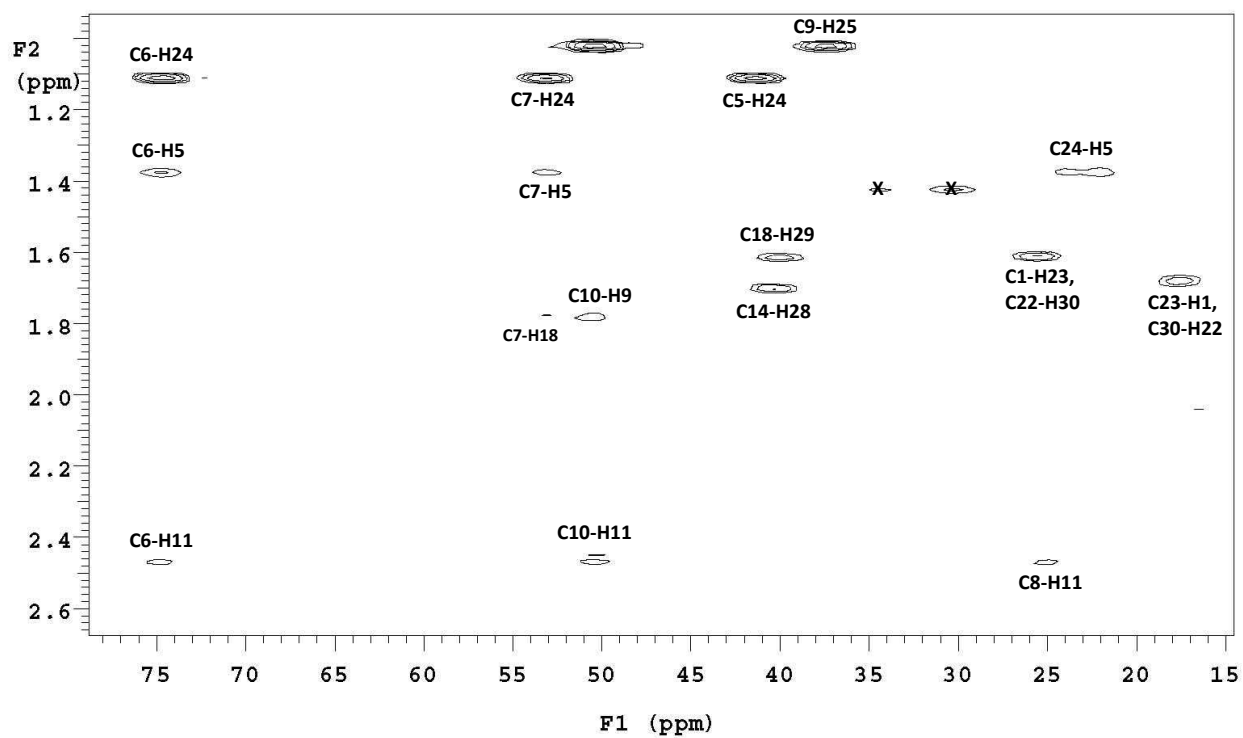

600 MHz, 25C  
5mm tube  
Cryoprobe  
Sample 2  
01 Dec 2008  
CDC13

Pulse Sequence: NOESY1D

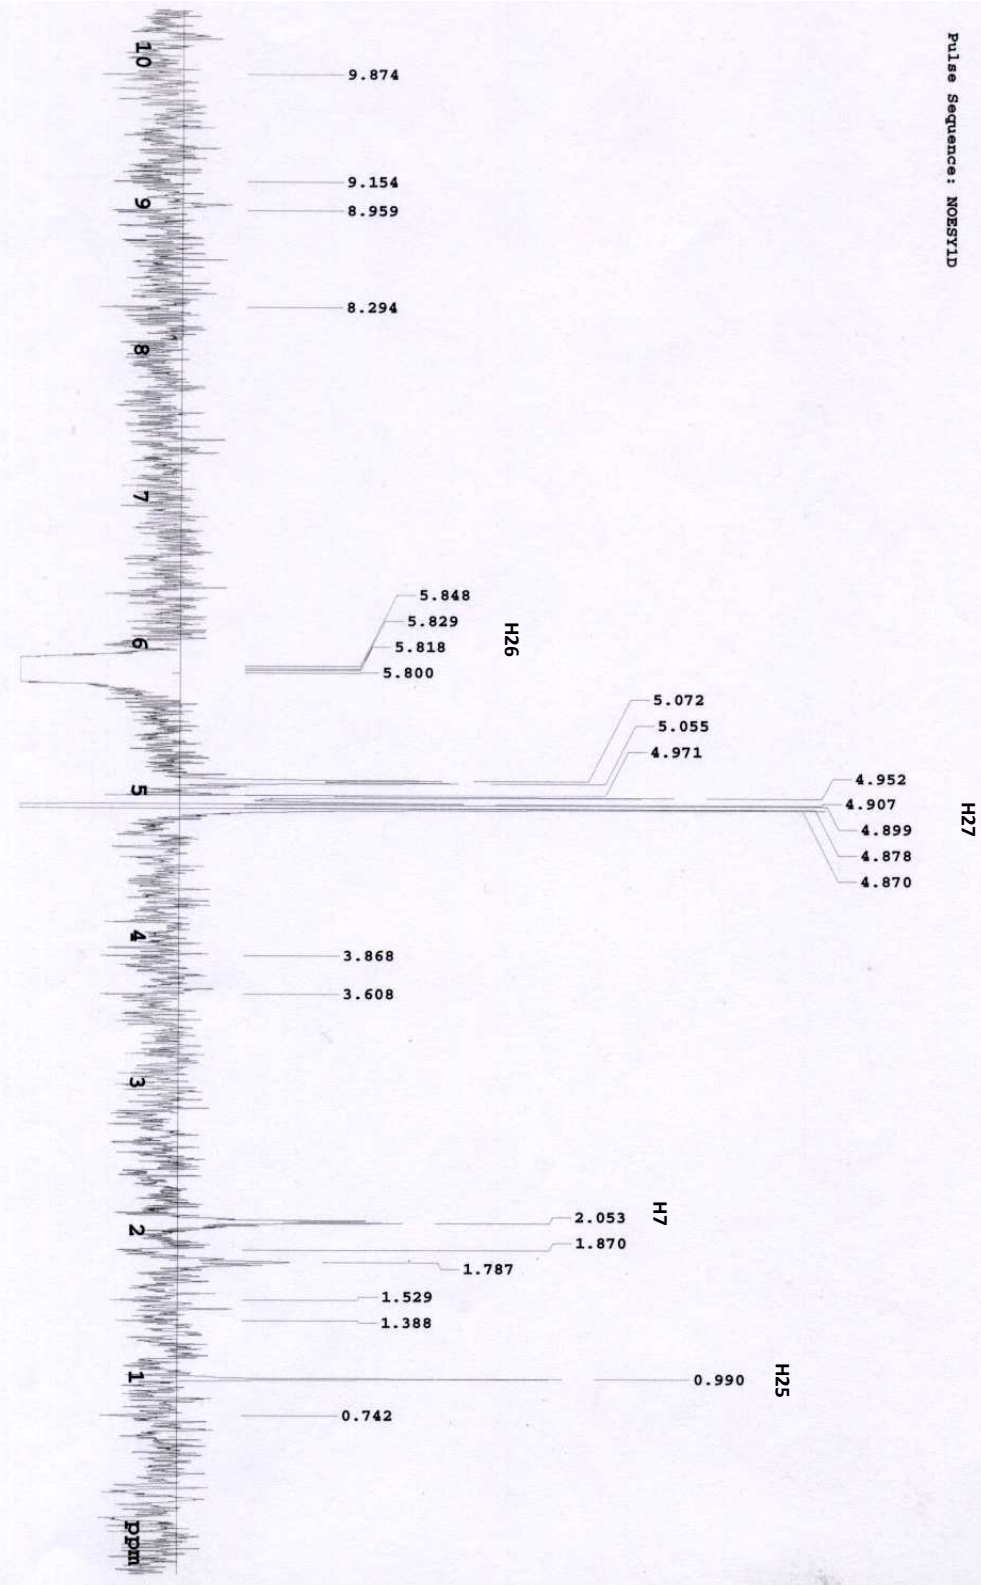

600 MHz, 25C  
5mm tube  
Cryoprobe  
Sample 2  
01 Dec 2008  
CDC13

Pulse Sequence: NOESY1D

500ms Mixing time

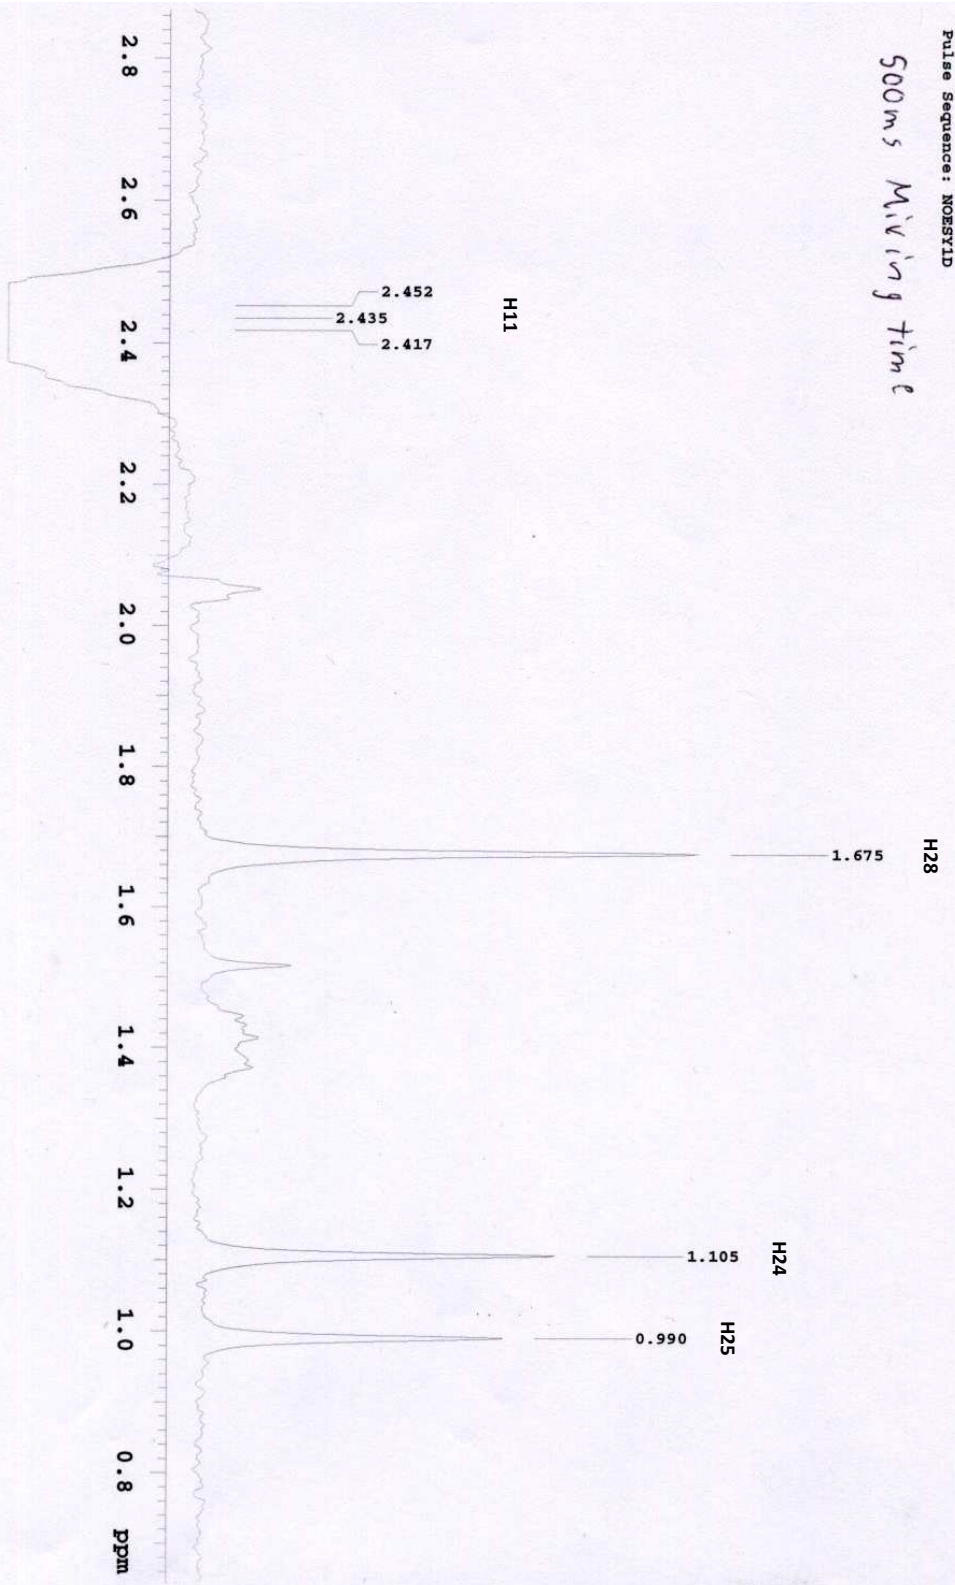

Supplement: NIHMS143892-supplement-1_si_001.pdf [file NIHMS143892-supplement-1_si_001.pdf]
